# Supplementary material
Source: MDPI journal article supplement (https://www.mdpi.com/2073-4395/12/2/469)
Supplement: s1 [file s1]

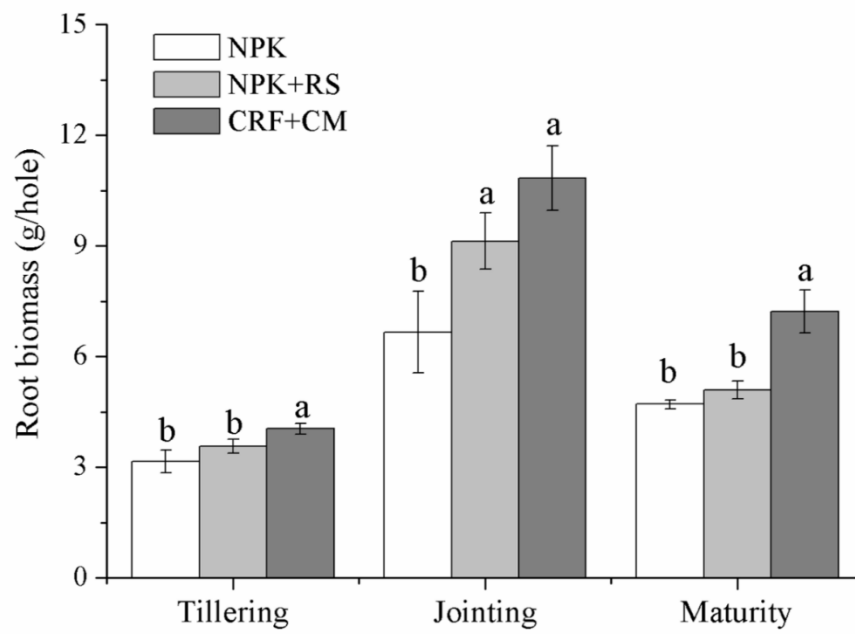

Figure S1. Root biomass under three fertilization regimes at three rice growth stages. NPK = mineral fertilizers alone; NPK+RS = mineral fertilizers plus rice straw; CRF+CM = controlled release blended fertilizer plus cattle manure. Values at the same rice growth stage followed by the same small letter are not significantly different at the 5% level of probability.

Table S1. Mean cost for early rice and late rice production under different fertilization managements.

|            | Treatment | Inorganic<br>fertilizer cost           | Organic<br>manure | Labor cost for<br>topdressing<br>fertilizers | Total cost |
|------------|-----------|----------------------------------------|-------------------|----------------------------------------------|------------|
|            |           | \$ ha <sup>-1</sup> year <sup>-1</sup> |                   |                                              |            |
| Early rice | NPK       | 282                                    | —                 | 94                                           | 376        |
|            | NPK+RS    | 282                                    | —                 | 94                                           | 376        |
|            | CRF+CM    | 315                                    | 24                | —                                            | 339        |
| Late rice  | NPK       | 282                                    | —                 | 47                                           | 329        |
|            | NPK+RS    | 282                                    | —                 | 47                                           | 329        |
|            | CRF+CM    | 315                                    | 24                | —                                            | 339        |

NPK = mineral fertilizers alone; NPK+RS = mineral fertilizers plus rice straw; CRF+CM = controlled release blended fertilizer plus cattle manure. All costs are converted into US dollars based on the 1 USD= 6.34 CNY.
